# Supplementary material
Source: Springer Nature journal article supplement (https://www.springermedizin.de/resource/supplementary/12885_2013_4324_MOESM2_ESM.pdf/9467712)

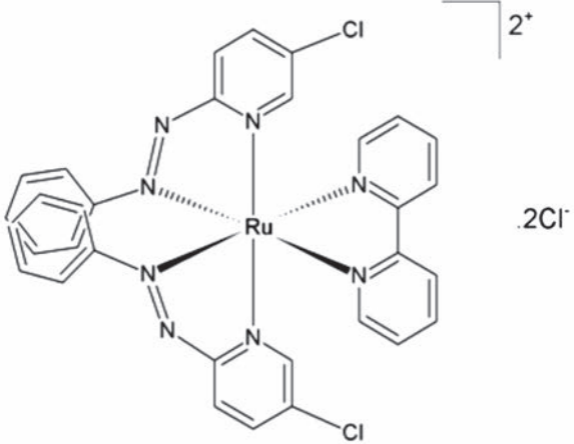

**1**

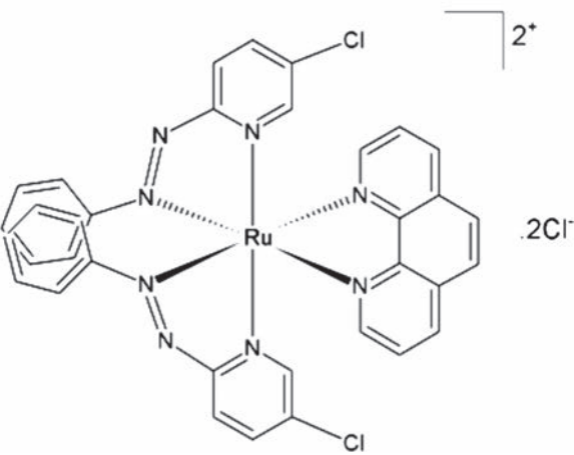

**2**

Supplement: MOESM2 [file 9467712]
